# Supplementary material for: Highly Sensitive and Specific Detection of Rare Variants in Mixed Viral Populations from Massively Parallel Sequence Data
Source: PubMed Central journal article supplement (PMC3305335; doi:10.1371/journal.pcbi.1002417), 2012-03-15
Supplement: pcbi.1002417.s002.pdf [file pcbi.1002417.s002.pdf]

Highly sensitive and specific detection of rare variants in mixed viral populations from massively parallel sequence data

Alexander R. Macalalad, Michael C. Zody, Patrick Charlebois, Niall J. Lennon, Ruchi M. Newman, Christine M. Malboeuf, Elizabeth M. Ryan, Christian L. Boutwell, Karen A. Power, Doug E. Brackney, Kendra N. Pesko, Joshua Z. Levin, Gregory D. Ebel, Todd M. Allen, Bruce W. Birren, Matthew R. Henn

**Table S1.** V-Phaser variant calls in experimental WNV mixed population.

| Variant | Strain1 | Strain2 | Strain3 | Strain4 | Strain5 | Strain6 | Strain7 | Strain8 | Expected Frequency* | Observed Frequency | V-Phaser | No Phase | No Composite Bernoulli |               |
|---------|---------|---------|---------|---------|---------|---------|---------|---------|---------------------|--------------------|----------|----------|------------------------|---------------|
|         |         |         |         |         |         |         |         |         |                     |                    |          |          | (i.e. Uniform)         | No NQS Filter |
| 4674C   | .       | .       | .       | .       | .       | .       | .       | T       | 0.007               | 0.000              | None     | None     | None                   | None          |
| 6433C   | .       | .       | .       | .       | .       | .       | .       | T       | 0.007               | 0.000              | None     | None     | None                   | None          |
| 8079C   | .       | .       | .       | .       | .       | .       | .       | T       | 0.007               | 0.000              | None     | None     | None                   | None          |
| 8295A   | G       | .       | .       | .       | .       | .       | .       | .       | 0.137               | 0.000              | None     | None     | None                   | Variant       |
| 8301C   | .       | .       | .       | .       | .       | .       | .       | T       | 0.007               | 0.000              | None     | None     | None                   | None          |
| 8751C   | .       | .       | .       | .       | .       | .       | .       | T       | 0.007               | 0.000              | None     | None     | None                   | None          |
| 9360T   | .       | .       | .       | .       | .       | .       | .       | A       | 0.007               | 0.000              | None     | None     | None                   | None          |
| 9537C   | .       | .       | .       | .       | .       | .       | .       | T       | 0.007               | 0.000              | None     | None     | None                   | None          |
| 3774C   | .       | .       | .       | .       | .       | .       | .       | T       | 0.007               | 0.003              | Error    | Error    | Error                  | Error         |
| 3625A   | .       | .       | .       | .       | .       | .       | .       | T       | 0.007               | 0.004              | Error    | Error    | Error                  | Error         |
| 7938C   | .       | .       | .       | .       | .       | .       | .       | T       | 0.007               | 0.006              | Variant  | Error    | Variant                | Variant       |
| 1442C   | .       | .       | .       | .       | .       | .       | .       | T       | 0.007               | 0.006              | Variant  | Variant  | Variant                | Variant       |
| 4146G   | .       | .       | .       | .       | .       | .       | .       | A       | 0.007               | 0.007              | Variant  | Variant  | Variant                | Variant       |
| 7785C   | .       | .       | .       | .       | .       | .       | .       | T       | 0.007               | 0.007              | Variant  | Error    | Variant                | Variant       |
| 6243A   | .       | .       | .       | .       | .       | .       | .       | G       | 0.007               | 0.008              | Variant  | Variant  | Variant                | Variant       |
| 2872G   | .       | .       | .       | .       | .       | .       | .       | A       | 0.007               | 0.008              | Variant  | Error    | Variant                | Variant       |
| 1492T   | .       | .       | .       | .       | .       | .       | .       | C       | 0.007               | 0.008              | Variant  | Variant  | Variant                | Variant       |
| 9352T   | .       | .       | .       | .       | .       | .       | .       | C       | 0.007               | 0.009              | Variant  | Error    | Variant                | Variant       |
| 5709C   | .       | .       | .       | .       | .       | .       | .       | T       | 0.007               | 0.009              | Variant  | Error    | Variant                | Error         |
| 7380G   | .       | .       | .       | .       | .       | .       | .       | A       | 0.007               | 0.010              | Variant  | Variant  | Variant                | Variant       |
| 6426T   | .       | .       | .       | .       | .       | .       | .       | C       | 0.007               | 0.011              | Variant  | Variant  | Variant                | Variant       |
| 2466T   | .       | .       | .       | .       | .       | .       | .       | C       | 0.007               | 0.013              | Variant  | Variant  | Variant                | Variant       |
| 4803T   | .       | .       | .       | .       | .       | .       | .       | C       | 0.007               | 0.013              | Variant  | Variant  | Variant                | Variant       |
| 6996T   | .       | .       | .       | .       | .       | .       | .       | C       | 0.007               | 0.013              | Variant  | Error    | Variant                | Variant       |
| 3270A   | .       | .       | .       | .       | .       | .       | .       | G       | 0.007               | 0.014              | Variant  | Variant  | Variant                | Variant       |
| 10341C  | .       | .       | .       | .       | .       | .       | .       | T       | 0.007               | 0.016              | Variant  | Error    | Variant                | Variant       |
| 7270T   | .       | .       | .       | .       | .       | .       | .       | C       | 0.007               | 0.024              | Variant  | Error    | Variant                | Variant       |
| 6741C   | .       | T       | .       | .       | .       | .       | .       | .       | 0.086               | 0.030              | Variant  | Variant  | Variant                | Variant       |
| 4164C   | .       | .       | .       | .       | .       | .       | .       | T       | 0.070               | 0.034              | Variant  | Variant  | Variant                | Variant       |
| 2674G   | .       | .       | .       | .       | .       | .       | .       | A       | 0.070               | 0.037              | Variant  | Variant  | Variant                | Variant       |
| 3300C   | .       | .       | .       | .       | .       | .       | .       | T       | 0.070               | 0.045              | Variant  | Variant  | Variant                | Variant       |
| 2904T   | .       | .       | .       | .       | .       | .       | .       | C       | 0.070               | 0.055              | Variant  | Variant  | Variant                | Variant       |
| 6780C   | .       | .       | .       | .       | T       | .       | .       | .       | 0.096               | 0.057              | Variant  | Variant  | Variant                | Variant       |
| 7518G   | .       | .       | .       | .       | .       | .       | .       | A       | 0.070               | 0.058              | Variant  | Variant  | Variant                | Variant       |
| 6060C   | .       | .       | .       | .       | T       | .       | .       | .       | 0.096               | 0.060              | Variant  | Variant  | Variant                | Variant       |
| 5544G   | .       | .       | .       | .       | .       | .       | .       | T       | 0.070               | 0.063              | Variant  | Variant  | Variant                | Variant       |
| 999C    | T       | .       | .       | .       | .       | .       | .       | .       | 0.137               | 0.064              | Variant  | Variant  | Variant                | Variant       |
| 666T    | .       | .       | .       | .       | .       | .       | .       | C       | 0.070               | 0.065              | Variant  | Variant  | Variant                | Variant       |
| 7320C   | .       | .       | .       | .       | T       | .       | .       | .       | 0.096               | 0.067              | Variant  | Variant  | Variant                | Variant       |
| 6964T   | .       | .       | .       | .       | C       | .       | .       | .       | 0.096               | 0.070              | Variant  | Variant  | Variant                | Variant       |
| 1599C   | .       | .       | .       | .       | T       | .       | .       | .       | 0.096               | 0.073              | Variant  | Variant  | Variant                | Variant       |
| 4882G   | .       | .       | .       | .       | .       | .       | .       | A       | 0.070               | 0.075              | Variant  | Variant  | Variant                | Variant       |
| 3556T   | .       | .       | .       | .       | .       | .       | .       | C       | 0.070               | 0.076              | Variant  | Variant  | Variant                | Variant       |
| 2922T   | .       | .       | C       | .       | .       | .       | .       | .       | 0.098               | 0.079              | Variant  | Variant  | Variant                | Variant       |
| 6871G   | .       | .       | .       | .       | A       | .       | .       | .       | 0.096               | 0.079              | Variant  | Variant  | Variant                | Variant       |
| 5940C   | .       | .       | .       | .       | .       | .       | .       | T       | 0.070               | 0.081              | Variant  | Variant  | Variant                | Variant       |
| 2934G   | .       | .       | A       | .       | .       | .       | .       | .       | 0.098               | 0.082              | Variant  | Variant  | Variant                | Variant       |
| 7548G   | .       | T       | .       | .       | .       | .       | .       | .       | 0.086               | 0.083              | Variant  | Variant  | Variant                | Variant       |
| 8766C   | .       | .       | T       | .       | .       | .       | .       | .       | 0.098               | 0.089              | Variant  | Variant  | Variant                | Variant       |
| 1779T   | .       | C       | .       | .       | .       | .       | .       | .       | 0.086               | 0.091              | Variant  | Variant  | Variant                | Variant       |
| 6228G   | .       | .       | .       | .       | .       | .       | .       | A       | 0.070               | 0.092              | Variant  | Variant  | Variant                | Variant       |
| 4017C   | .       | .       | .       | .       | .       | .       | .       | T       | 0.070               | 0.093              | Variant  | Variant  | Variant                | Variant       |
| 6162A   | .       | .       | G       | .       | .       | .       | .       | .       | 0.098               | 0.094              | Variant  | Variant  | Variant                | Variant       |
| 6183C   | .       | .       | T       | .       | .       | .       | .       | .       | 0.098               | 0.095              | Variant  | Variant  | Variant                | Variant       |
| 1728A   | .       | .       | .       | .       | G       | .       | .       | .       | 0.096               | 0.099              | Variant  | Variant  | Variant                | Variant       |
| 10408C  | .       | .       | .       | .       | .       | .       | .       | T       | 0.077               | 0.100              | Variant  | Variant  | Variant                | Variant       |
| 9151C   | T       | .       | .       | .       | .       | .       | .       | .       | 0.137               | 0.100              | Variant  | Variant  | Variant                | Variant       |
| 6993T   | .       | .       | .       | .       | .       | .       | .       | C       | 0.070               | 0.103              | Variant  | Variant  | Variant                | Variant       |
| 10347T  | C       | .       | .       | .       | .       | .       | .       | .       | 0.137               | 0.103              | Variant  | Variant  | Variant                | Variant       |
| 5814T   | .       | .       | C       | .       | .       | .       | .       | .       | 0.098               | 0.103              | Variant  | Variant  | Variant                | Variant       |
| 7917C   | .       | .       | .       | .       | T       | .       | .       | .       | 0.096               | 0.104              | Variant  | Variant  | Variant                | Variant       |
| 5628G   | .       | .       | .       | .       | A       | .       | .       | .       | 0.096               | 0.105              | Variant  | Variant  | Variant                | Variant       |
| 3234T   | .       | .       | .       | .       | C       | .       | .       | .       | 0.096               | 0.107              | Variant  | Variant  | Variant                | Variant       |
| 573C    | .       | .       | .       | .       | T       | .       | .       | .       | 0.096               | 0.112              | Variant  | Variant  | Variant                | Variant       |
| 9687C   | .       | .       | .       | .       | T       | .       | .       | .       | 0.096               | 0.115              | Variant  | Variant  | Variant                | Variant       |

|        |   |   |   |   |   |   |   |   |       |       |         |         |         |         |
|--------|---|---|---|---|---|---|---|---|-------|-------|---------|---------|---------|---------|
| 562C   | . | . | . | . | T | . | . | . | 0.096 | 0.116 | Variant | Variant | Variant | Variant |
| 2253A  | G | . | . | . | . | . | . | . | 0.137 | 0.117 | Variant | Variant | Variant | Variant |
| 9960T  | . | . | . | . | C | . | . | . | 0.096 | 0.121 | Variant | Variant | Variant | Variant |
| 5135T  | . | . | . | . | C | . | . | . | 0.096 | 0.125 | Variant | Variant | Variant | Variant |
| 6234A  | . | G | . | . | . | . | . | . | 0.086 | 0.125 | Variant | Variant | Variant | Variant |
| 3810C  | . | . | . | . | T | . | . | . | 0.096 | 0.128 | Variant | Variant | Variant | Variant |
| 3346C  | . | . | . | A | . | . | C | . | 0.146 | 0.132 | Variant | Variant | Variant | Variant |
| 6210C  | T | . | . | . | . | . | . | . | 0.137 | 0.133 | Variant | Variant | Variant | Variant |
| 9603A  | . | . | G | . | . | . | . | . | 0.098 | 0.133 | Variant | Variant | Variant | Variant |
| 9123C  | . | . | . | T | . | . | . | . | 0.146 | 0.134 | Variant | Variant | Variant | Variant |
| 1293C  | . | . | . | . | . | T | . | . | 0.146 | 0.135 | Variant | Variant | Variant | Variant |
| 6820C  | . | . | . | T | . | . | . | . | 0.146 | 0.136 | Variant | Variant | Variant | Variant |
| 5805T  | . | . | . | C | . | . | . | . | 0.146 | 0.136 | Variant | Variant | Variant | Variant |
| 7182C  | . | . | . | T | . | . | . | . | 0.146 | 0.136 | Variant | Variant | Variant | Variant |
| 4536G  | . | . | . | A | . | . | . | . | 0.146 | 0.141 | Variant | Variant | Variant | Variant |
| 7161C  | . | . | . | T | . | . | . | . | 0.146 | 0.142 | Variant | Variant | Variant | Variant |
| 7158A  | . | . | . | G | . | . | . | . | 0.146 | 0.142 | Variant | Variant | Variant | Variant |
| 7110C  | . | . | . | T | . | . | . | . | 0.146 | 0.143 | Variant | Variant | Variant | Variant |
| 7134C  | T | . | . | . | . | . | . | . | 0.137 | 0.146 | Variant | Variant | Variant | Variant |
| 6288C  | . | . | . | T | . | . | . | . | 0.146 | 0.148 | Variant | Variant | Variant | Variant |
| 1533C  | T | . | . | . | . | . | . | . | 0.137 | 0.149 | Variant | Variant | Variant | Variant |
| 8808C  | T | . | . | . | . | . | . | . | 0.137 | 0.150 | Variant | Variant | Variant | Variant |
| 6721G  | . | . | . | A | . | . | . | . | 0.146 | 0.150 | Variant | Variant | Variant | Variant |
| 6007C  | . | . | . | T | . | . | . | . | 0.146 | 0.151 | Variant | Variant | Variant | Variant |
| 1117G  | . | . | . | A | . | . | . | . | 0.146 | 0.157 | Variant | Variant | Variant | Variant |
| 7977A  | G | . | . | . | . | . | . | . | 0.137 | 0.157 | Variant | Variant | Variant | Variant |
| 3138T  | . | . | . | C | . | . | . | . | 0.146 | 0.160 | Variant | Variant | Variant | Variant |
| 6246T  | . | . | . | C | . | . | . | . | 0.146 | 0.169 | Variant | Variant | Variant | Variant |
| 3111G  | A | . | . | . | . | . | . | . | 0.137 | 0.173 | Variant | Variant | Variant | Variant |
| 7893C  | . | . | . | . | . | T | . | . | 0.146 | 0.175 | Variant | Variant | Variant | Variant |
| 9439G  | A | . | . | . | . | . | . | . | 0.137 | 0.178 | Variant | Variant | Variant | Variant |
| 4129C  | T | . | . | . | . | . | . | . | 0.137 | 0.179 | Variant | Variant | Variant | Variant |
| 3120G  | A | . | . | . | . | . | . | . | 0.137 | 0.186 | Variant | Variant | Variant | Variant |
| 5211A  | . | . | . | . | G | . | . | . | 0.096 | 0.186 | Variant | Variant | Variant | Variant |
| 7959C  | . | . | . | . | T | . | . | . | 0.096 | 0.193 | Variant | Variant | Variant | Variant |
| 5134A  | . | . | G | . | G | . | . | . | 0.194 | 0.233 | Variant | Variant | Variant | Variant |
| 6238C  | T | . | T | . | . | . | . | . | 0.235 | 0.236 | Variant | Variant | Variant | Variant |
| 9912C  | . | T | . | . | . | T | . | . | 0.232 | 0.239 | Variant | Variant | Variant | Variant |
| 483C   | . | T | . | . | . | T | . | . | 0.232 | 0.250 | Variant | Variant | Variant | Variant |
| 8283G  | . | A | . | . | . | A | . | . | 0.232 | 0.282 | Variant | Variant | Variant | Variant |
| 7221C  | . | T | . | . | . | T | . | . | 0.232 | 0.284 | Variant | Variant | Variant | Variant |
| 4389G  | . | A | . | . | . | A | . | . | 0.232 | 0.315 | Variant | Variant | Variant | Variant |
| 10400T | . | . | C | . | . | . | . | . | 0.098 | 0.410 | Variant | Variant | Variant | Variant |
| 7878C  | . | T | . | . | . | T | . | . | 0.232 | 0.427 | Variant | Variant | Variant | Variant |
| 660T   | . | C | . | . | . | C | C | . | 0.309 | 0.475 | Variant | Variant | Variant | Variant |

\* The eight parental strains were mixed at equal proportions and then infected into mosquito cells and allowed to proliferate, resulting in a final mixture with ratios set by the relative replicative success of the strains. Thus, we have not set the true proportion of the parental strains in the sequenced mixture. However, since we know the strain or strains of origin for all of the variants, we can infer the mix of parental strain proportions that maximizes the likelihood of observing the actual counts (including zero) of all parental alleles in the sequencing data. The resultant frequencies are presented in the "expected" column to provide a most likely measure of the true frequency of the variants in the population. This allow us to capture the full effects of stochastic variation in the sequencing process on our ability to detect variants of given population frequency.
